# Supplementary material
Source: publisher site journal article supplement (https://www.dovepress.com/article/602964)
Supplement: Supplementary file 1 [file 602964%20Revised%20Supplementary%20Materials.pdf]

## Supplementary Table 1

**Supplementary Table 1.** Optical properties of Clareon Vivity and TECNIS PureSee IOLs

| Parameter          | Clareon Vivity                                                                                                                                                                      | TECNIS PureSee                                                                                                                                                                                         |
|--------------------|-------------------------------------------------------------------------------------------------------------------------------------------------------------------------------------|--------------------------------------------------------------------------------------------------------------------------------------------------------------------------------------------------------|
| Optic name         | Clareon® Vivity® IOL (CNWET0)                                                                                                                                                       | TECNIS PureSee™ IOL (DEN00V)                                                                                                                                                                           |
| Optic design       | Biconvex and aspheric non-diffractive nature<br>[Anterior] Fully refractive EDoF surface with X-WAVE™ wavefront-shaping technology<br>[Posterior] Proprietary posterior square edge | Biconvex and aspheric non-diffractive nature<br>[Anterior] Correcting corneal SA to near “0”<br>[Posterior] Refractive EDoF with wavefront-shaping, the frosted, continuous 360° posterior square edge |
| Optic material     | [Composition] Advanced hydrophobic acrylic bended with hydroxyethyl methacrylate (HEMA)<br>[Light-filtering] UV-absorbing with a blue-light filter<br>[Color] A yellowish tint      | [Composition] Hydrophobic acrylate with a frosted haptic design<br>[Light-filtering] UV-absorbing with a violet-light filter<br>[Color] Transparent                                                    |
| Optic diameter     | 6 mm                                                                                                                                                                                | 6 mm                                                                                                                                                                                                   |
| Overall length     | 13 mm                                                                                                                                                                               | 13 mm                                                                                                                                                                                                  |
| A constant (SRK/T) | 119.2 (Optical), 118.8 (Ultrasound)                                                                                                                                                 | 119.2 (Optical), 118.8 (Ultrasound)                                                                                                                                                                    |
| Optic power        | +10.0 to +30.0 D (in 0.5 D increments)                                                                                                                                              | +5.0 to +34.0 D (in 0.5 D increments)                                                                                                                                                                  |
| Refractive index   | 1.55                                                                                                                                                                                | 1.47                                                                                                                                                                                                   |
| Manufacturer       | Alcon Laboratories, Inc.(TX, USA)                                                                                                                                                   | Johnson & Johnson Surgical Vision(Irvine, USA)                                                                                                                                                         |

Note: IOL=intraocular lens; EDoF=extended depth of focus; D=diopeters; SA=spherical aberration; UV=ultraviolet. Data sourced from manufacturer specifications.

### Supplementary Figure 1

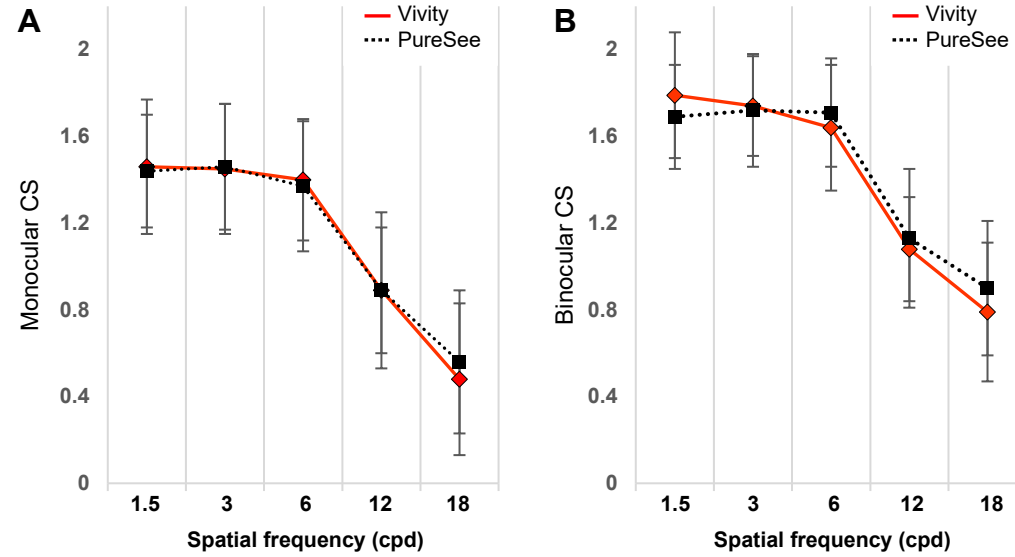

**Supplementary Figure 1.** Monocular (A) and binocular (B) CS at 1.5–18 cpd under photopic conditions at 1 month for Clareon Vivity and TECNIS PureSee IOLs. CS, contrast sensitivity. Data shown as mean  $\pm$  SD. No significant differences ( $p > 0.05$ ).
